# Supplementary material
Source: PubMed Central journal article supplement (PMC1690765)
Supplement: 11075713s01.pdf [file 11075713s01.pdf]

This is an appendix to the paper by Morand & Harvey 2000 Mammalian metabolism, longevity and parasite species richness. *Proc. R. Soc. Lond. B* **267**, 1999–2003.

Electronic appendices are referred with the text. However, no attempt has been made to impose a uniform editorial style on the electronic appendices.

## **Appendix A. Sources for numbers of parasitic helminth species found in mammals.**

- Alden, K.J. 1995. Helminths of the Opossum, *Didelphis virginiana*, in Southern Illinois, with a compilation of all Helminths reported from this host in North America. *Journal Helminthological Society of Washington*. 62: 197-208.
- Allen, R.W. 1956. Parasites of mountain sheep in New Mexico. *Journal of Parasitology* 583-587.
- Andrews, C.L. and W.R. Davidson. 1980. Endoparasites of selected populations of cottontail rabbits (*Sylvilagus floridanus*) in the southeastern United States. *Journal of Wildlife Diseases*. 16: 395-401.
- Barrett, R.E. and D.E. Worley. 1970. Parasites of the Pika (*Ochotona princeps*) in two counties in south-central Montana, with new host records. *Proceeding Helminthological Society Washington* 37: 179-181.
- Boag, B. 1985. The incidence of helminth parasites from the wild rabbit *Oryctolagus cuniculus* (L.) in Eastern Scotland. *Journal of Helminthology* 59: 61-69.
- Bookhout, T.A. 1971. Helminth parasites in snowshoe hares from Northern Michigan. *Journal of Wildlife Diseases* 7: 246-248.
- Butterworth, E.W. and M. Beverley-Burton. 1981. Observations on the prevalence and intensity of *Capillaria spp.* (Nematoda: Trichuroidea) in Wild Carnivora from Ontario, Canada. *Proceeding Helminthological Society Washington* 48: 24-37.
- Bye, K. and O. Halvorsen. 1983. Abomasal nematodes of the svalbard reindeer (*Rangifer tarandus platyrhynchus* vrolik). *Journal of Wildlife Diseases* 19: 101-105.
- Casas M.C., L.M. Zalles, M.J. Patrick & M. Dailey. 1995. Intestinal helminths of Capybara (*Hydrochaeris hydrochaeris*) from Bolivia. *Journal Helminthological Society of Washington* 62: 87-88.
- Conti, J.A., D. J. Forrester and J.R. Brady. 1983. Helminths of Black Bears in Florida. *Proceeding Helminthological Society Washington* 50: 252-256.

- Corn, J.L., D.B. Pence and R.J. Warren. 1985. Factors affecting the helminth community structure of adult collared peccaries in Southern Texas. *Journal of Wildlife Diseases* 21: 254-263.
- Crum, J.M., V.F. Nettles and W.R. Davidson. 1978. Studies on endoparasites of the Black Bear (*Ursus americanus*) in the Southeastern United States. *Journal of Wildlife Diseases*. 14: 178-186.
- Davidson, W.R. 1976. Endoparasites of selected populations of Gray Squirrels (*Sciurus carolinensis*) in the Southeastern United States. *Proceeding Helminthological Society Washington* 43: 211-217.
- Dibble, E.D., W.F. Font and D.D. Wittrock 1983. Helminths of the Red Fox, *Vulpes vulpes* L., in West Central Wisconsin. *Journal of Parasitology* 69: 1170-1172.
- Eslami, A. and S. Farsad-Hamdi. 1992. Helminth parasites of Wild Bear, *Sus scrofa*, in Iran. *Journal of Wildlife Diseases* 28: 316-318.
- Fabiyi, J.P. 1979. Helminths of the pig on the Jos Plateau, Nigeria: relative prevalence, abundance and economic significance. *Journal of Helminthology* 53: 65-71.
- Feliu C., F. Renaud, F. Catzefflis, P. Durand, J.-P. Hugot & S. Morand. 1997. A comparative analysis of parasite species richness of Iberian rodents. *Parasitology* 115: 453-466.
- Forrester, D.J., D.B. Pence, A.O. Bush, D.M. Lee & N.R. Holler. 1987. Ecological analysis of the helminths of round-tailed muskrats (*Neofiber alleni* True) in southern Florida. *Canadian Journal of Zoology* 65: 2976-2979.
- Hoberg, E.P. and S.G. McGee. 1982. Helminth parasitism in racoons, *Procyon lotor hirtus* Nelson and Goldman, in Saskatchewan. *Canadian Journal of Zoology* 60: 53-57.
- Hoeve, J., D.G. Joachim and E.M. Addison. 1988. Parasites of Moose (*Alces alces*) from an Agricultural Area of Eastern Ontario. *Journal of Wildlife Diseases* 24: 371-374.
- Huffman, J.E. and L.R. Penner. 1981. Helminths from the Short-tail Shrew, *Blarina brevicaudata*, in Connecticut with reference to the histopathology of *Capillaria*. *Proceeding Helminthological Society Washington* 48: 209-213.
- Kinsella, J.M. 1990. Comparison of helminths of three species of mice, *Peromyscus floridanus*, *Peromyscus gossypinus*, and *Peromyscus polionotus*, from southern Florida. *Canadian Journal of Zoology* 69: 3078-3083.
- Kistner, T.P., S.M. Matlock, D. Wyse and G.E. Mason. 1977. Helminth parasites of bighorn sheep in Oregon. *Journal of Wildlife Diseases*. 13: 125-130.
- Krecek, R.C., J. Boomker, B.L. Penzhorn and L. Scheepers. 1990. Internal parasites of Giraffes (*Giraffa camelopardalis angolensis*) from Etosha National Park, Namibia. *Journal of Wildlife Diseases* 26: 395-397.
- Krecek, R.C., J.P. Louw and J.C. Sneddon. 1995. Parasites of Feral horses from the Namib Desert, Namibia. *Proceeding Helminthological Society Washington* 62: 85-86.

- Krecek, R.C., F.S. Malan, R.K. Reinecke and V. de Vos. 1987. Nematode parasites from Burchell's Zebras in South Africa. *Journal of Wildlife Diseases*. 23: 404-411.
- Krecek, R.C., R.K. Reinecke, N.J.P. Kriek, I.G. Horak and F.S. Malan. 1994. Helminths parasites of Cape Mountain Zebras from Cape Province, South Africa. *Journal of Wildlife Diseases* 30: 227-280.
- Jennings, D.H., W. Threlfall and D.G. Dodds. 1982. Metazoan parasites and food of short-tailed weasels and mink in Newfoundland, Canada. *Canadian Journal of Zoology* 60: 180-183.
- Lepitzki, D.A.W., A. Woolf and B.M. Bunn. 1992. Parasites of cottontail rabbits of Southern Illinois. *Journal of Parasitology* 78: 1080-1083.
- Lewis, J.W. 1968. Studies on the helminth parasites of voles and shrews from Wales. *Journal of Zoology* 154: 313-331.
- Marhrt, J.L. and S. Chai. 1972. Parasites of Red Squirrels in Alberta, Canada. *Journal of Parasitology* 58: 639-640.
- McKenzie, M.E. and W.R. Davidson. 1989. Helminth parasites of intermingling Axis deer, wild swine and domestic cattle from the island of Molokai, Hawaii. *Journal of Wildlife Diseases* 25: 252-257.
- Measures, L.N. and R.C. Anderson. 1983. Characteristics of natural infection of the stomach worm, *Obeliscoides cuniculi* (Graybill) in lagomorphs and woodchucks in Canada. *Journal of Wildlife Diseases* 19: 219-224.
- Morand S. & R. Poulin, 1998. Density, body mass and parasite species richness of terrestrial mammals. *Evolutionary Ecology* 12: 717-727.
- Pence, D.B., J.M. Crum and J.A. Conti. 1983. Ecological analyses of helminth populations in the Black Bear, *Ursus americanus*, from North America. *Journal of Parasitology* 69: 933-950.
- Pence, D.B., R.J. Warren and C.R. Ford. 1988. Visceral helminth communities of an insular population of feral swine. *Journal of Wildlife Diseases* 24 : 105-112.
- Purglove, S.R. 1977. Helminth parasites of white-tailed deer (*Odocoileus virginianus*) from New Jersey and Oklahoma. *Proceeding Helminthological Society Washington* 44(1): 107-108.
- Rickard, L.G. and J.K. Bishop. 1991. Helminth parasites of Llamas (*Lama glama*) in the Pacific Northwest. *Proceeding Helminthological Society Washington*. 58: 110-115.
- Samuel, W.M., S. Ramalingan and L.N. Carbyn. 1978. Helminths in coyotes (*Canis latrans* Say), wolves (*Canis lupus* L.) and red foxes (*Vulpes vulpes* L.) of southwestern Manitoba. *Canadian Journal of Zoologie* 56: 2641-2617.
- Samson, K.S. 1968. Helminths of Black-Tailed Jack Rabbits in New Mexica. *Bulletin Wildlife Disease Association* 4:130.

- Stock, T.M. and M.W. Barrett. 1983. Helminth Parasites of the Gastrointestinal tracts and lungs of Moose (*Alces alces*) and Wapiti (*Cervus elaphus*) from Cypress Hills, Alberta, Canada. Proceeding Helminthological Society Washington 50: 246-251.
- Strohlein, D.A. and B.M. Christensen. 1983. Metazoan parasites of the eastern cottontail rabbit in Western Kentucky. Journal of Wildlife Diseases. 19(1): 20-23.
- Todd, K.S., D.L. Lepp and C.A. Tryon. 1971. Endoparasites of the Northern Pocket Gopher from Wyoming. Journal of Wildlife Disease 7: 100-104.
- Waid, D.D. and D.B. Pence. 1988. Helminths of mountain lions (*Felis concolor*) from southwestern Texas, with a redescription of *Cylcospirura subaequalis* (Molin, 1860) Vevers, 1922. Canadian Journal of Zoology 66: 2110-2117.
- Worley, D.E. and C.D. Eustace. 1972. Prevalence of Helminth parasites in Mule Deer from Eastern Montana. Proceeding Helminthological Society Washington 39:135-138.
